# Supplementary material for: Surface lattice enhancement of red-emitting fluorides enabled by embedding small cations
Source: Royal Society of Chemistry journal article supplement (doi:10.1039/d3qi01088k), 2023-01-01
Supplement: d3qi01088k2.pdf [file d3qi01088k2.pdf]

**Electronic Supplementary Information (ESI)**

**Surface lattice enhancement of red-emitting fluoride  
enabled by embedding small cations**

Pingping Wan, Chen Yang, Aolin Wang, Liping Yu, Shixun Lian and Wenli Zhou\*

Key Laboratory of Light Energy Conversion Materials of Hunan Province College,  
Key Laboratory of Chemical Biology and Traditional Chinese Medicine Research  
(Ministry of Education of China), College of Chemistry and Chemical Engineering,  
Hunan Normal University, Changsha 410081, China

\* Corresponding author (chemwlzhou@hunnu.edu.cn (W. Zhou))

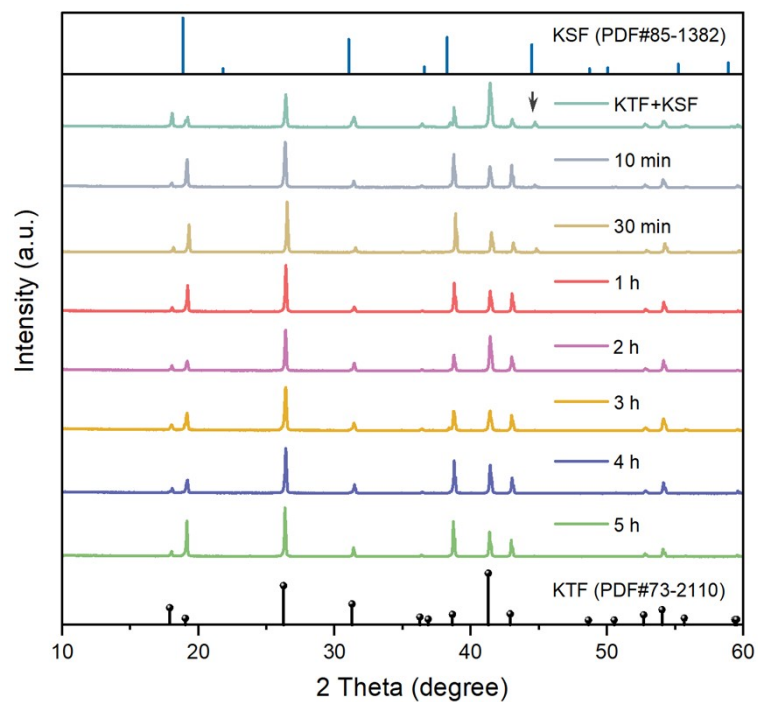

**Fig. S1** XRD patterns of KTFM@KTSF synthesized for different reaction time (10 min, 30 min, 1 h, 2 h, 3 h, 4 h, 5 h).

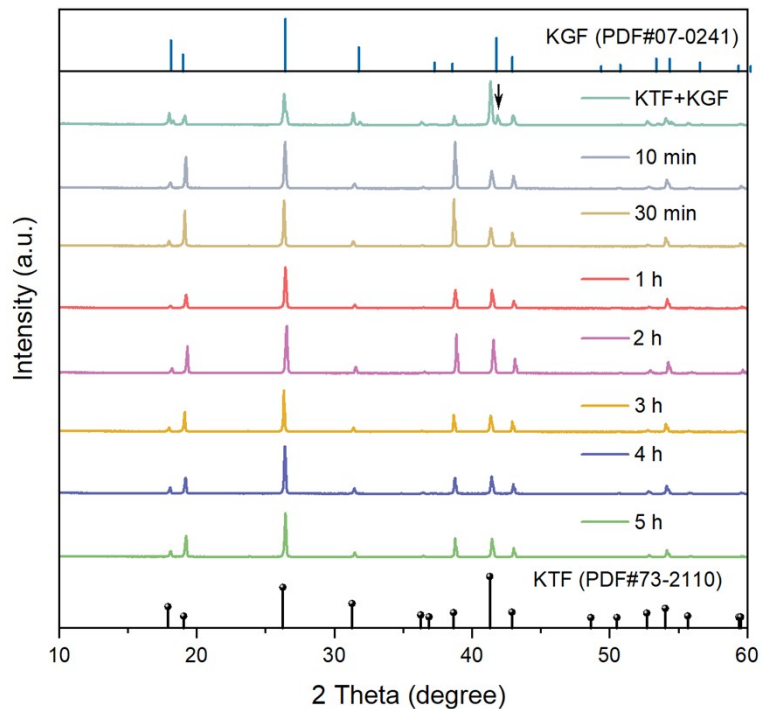

**Fig. S2** XRD patterns of KTFM@KTGF synthesized for different reaction time (10 min, 30 min, 1 h, 2 h, 3 h, 4 h, 5 h).

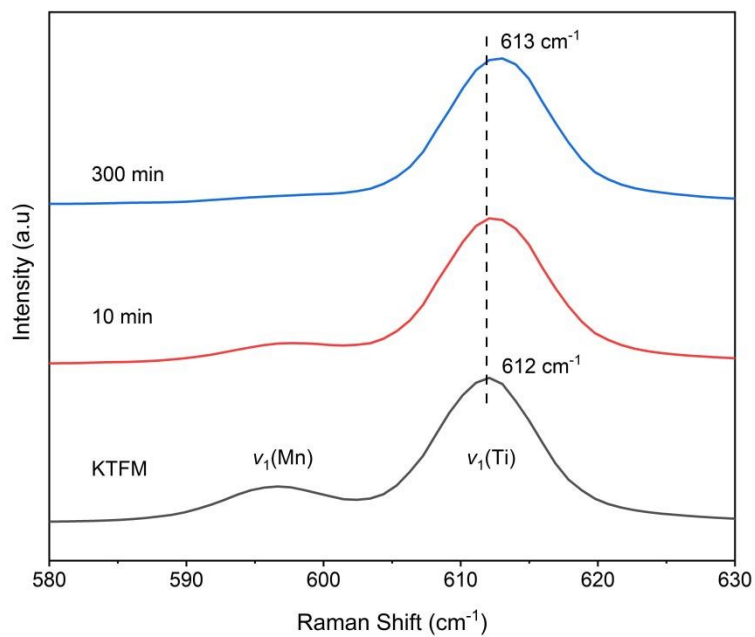

**Fig. S3** Raman spectra of KTFM, KGFM and KTFM.

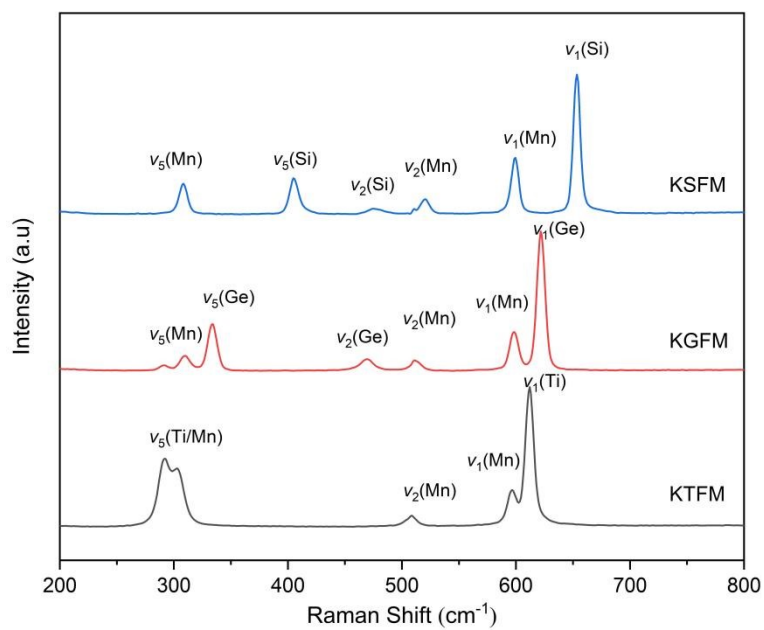

**Fig. S4** Raman spectra of KTFM and KTFM@KTSF synthesized for different reaction time (10 min and 300 min).

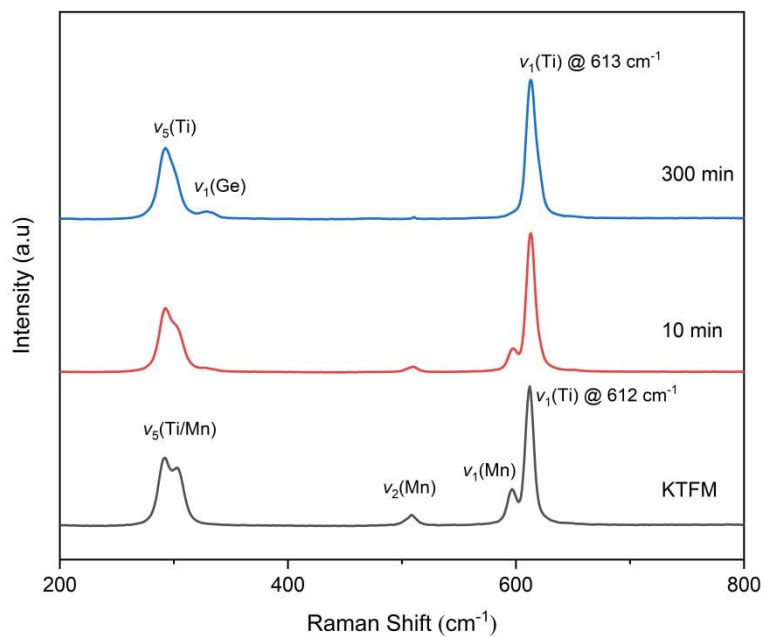

**Fig. S5** Raman spectra of KTFM and KTFM@KTGF synthesized for different reaction time (10 min and 300 min).

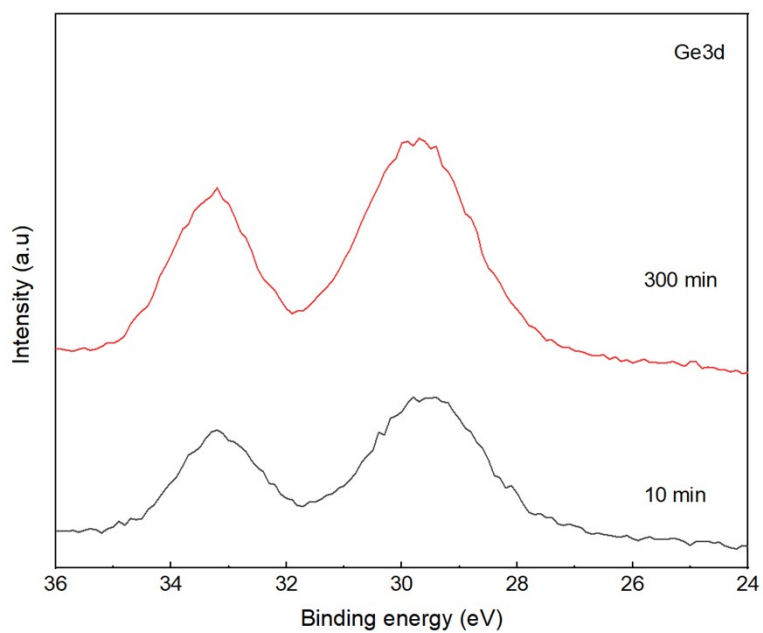

**Fig. S6** Ge3d XPS spectra of KTFM@KTGF synthesized for different reaction time (10 min and 300 min).

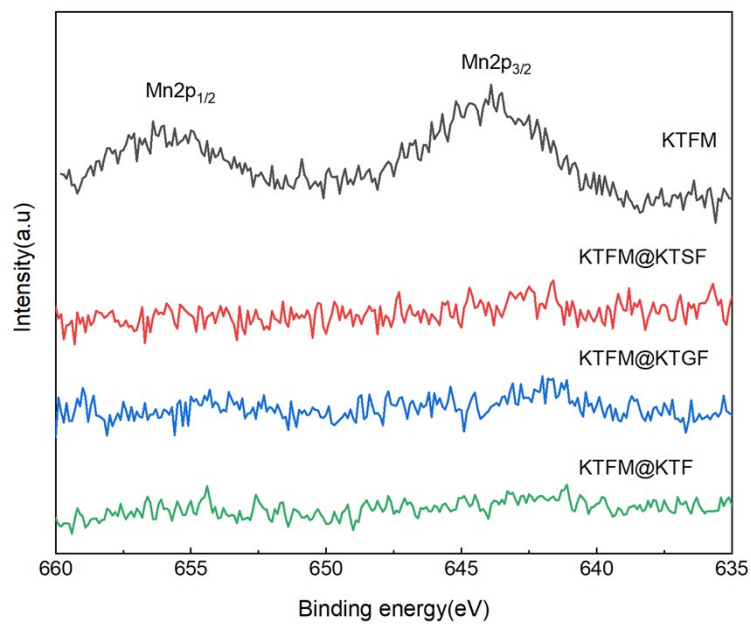

**Fig. S7** Mn2p XPS spectra of KTFM, KTFM@KTSF, KTFM@KTGF and KTFM@KTF.

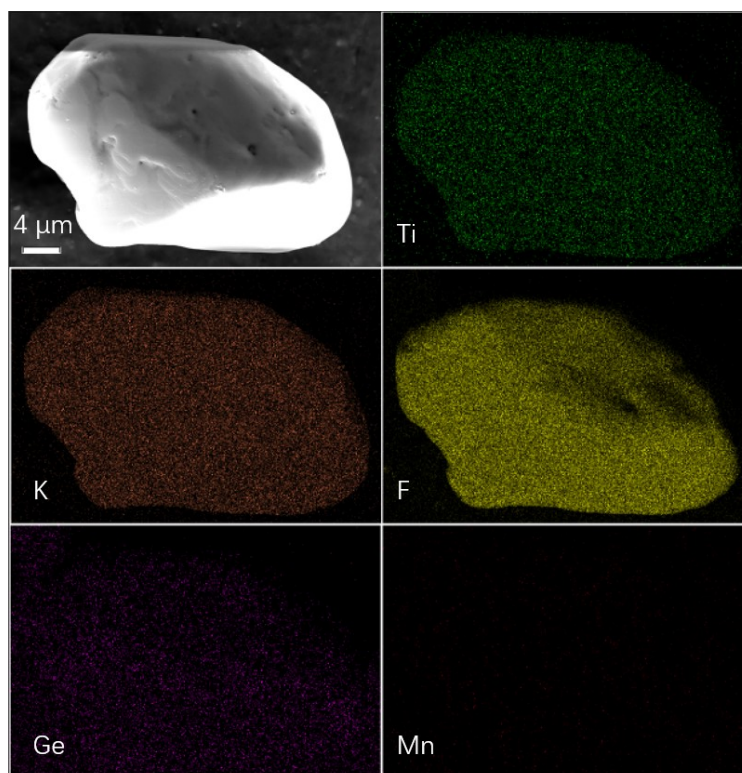

**Fig. S8** SEM image and EDS of KTFM@KTGF.

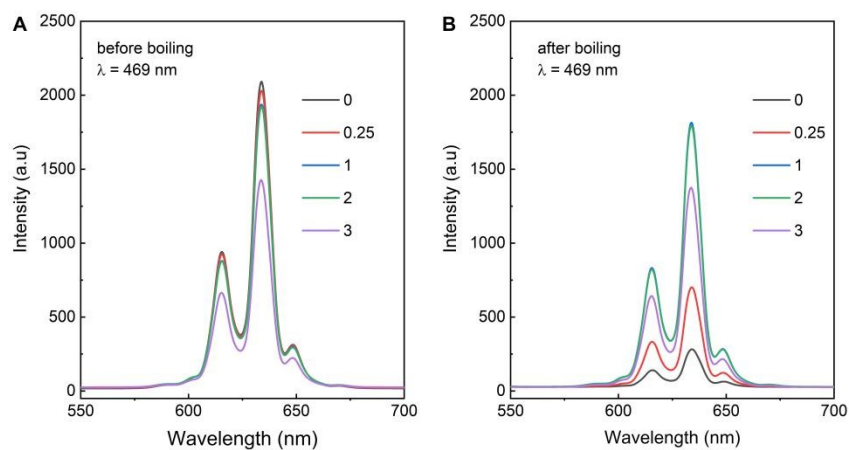

**Fig. S9** PL spectra of as-prepared KTFM@KTSF samples using varied GA volume, (A) before boiling, (B) after boiling.

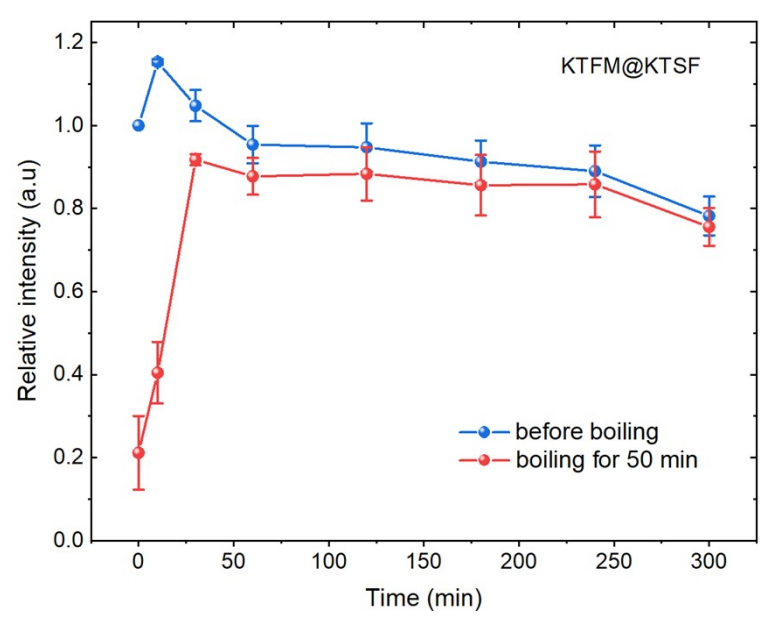

**Fig. S10** Relative PL intensities of KTFM@KTSF as a function of reaction time, blue: before boiling, red: after boiling for 50 min.

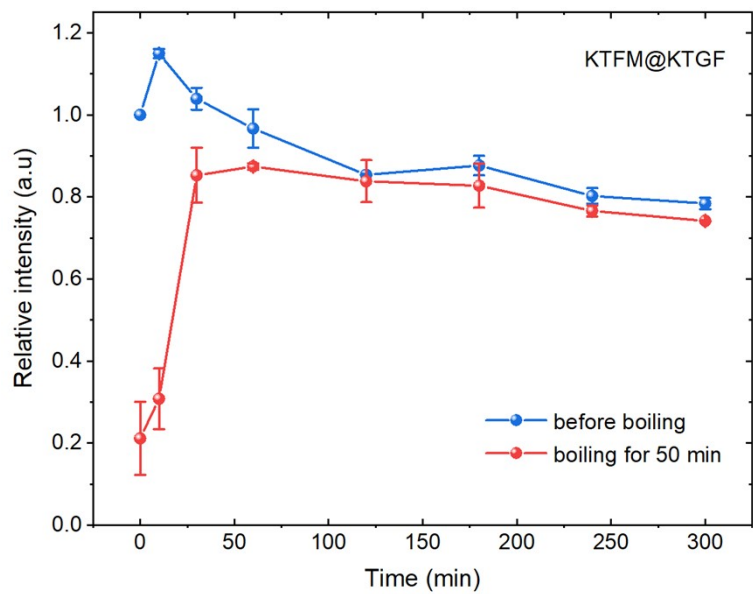

**Fig. S11** Relative PL intensities of KTFM@KTGF as a function of reaction time, blue: before boiling, red: after boiling for 50 min.

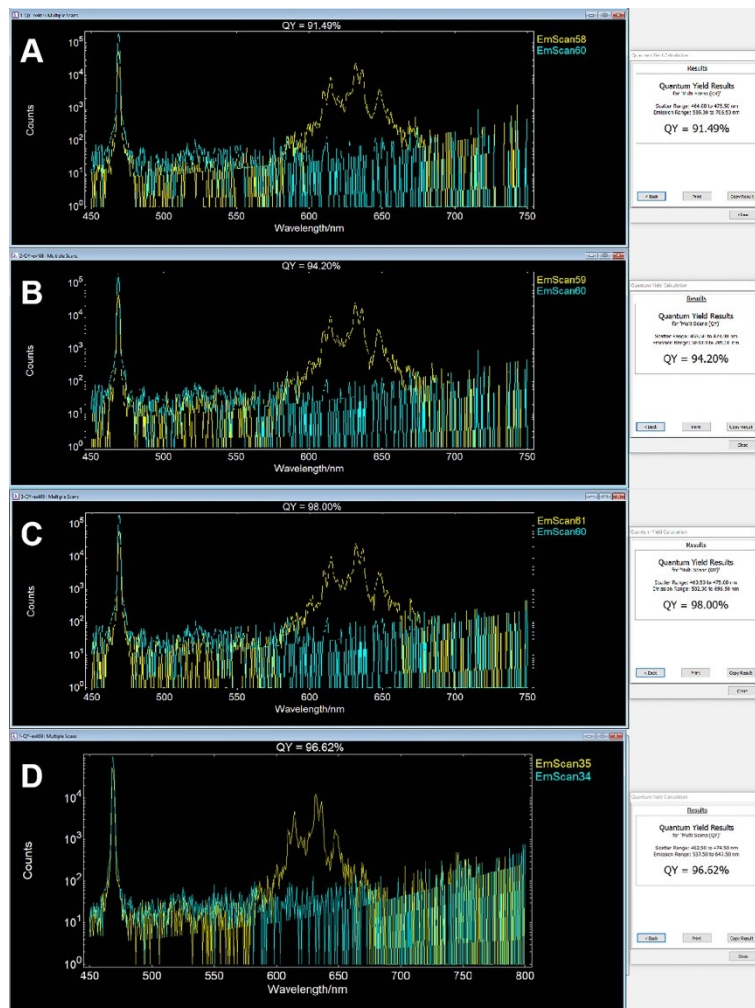

**Fig. S12** Quantum efficiency results of four fluorides, (A) KTFM, (B) KTFM@KTSF, (C) KTFM@KTGF, (D) KTFM@KTF.



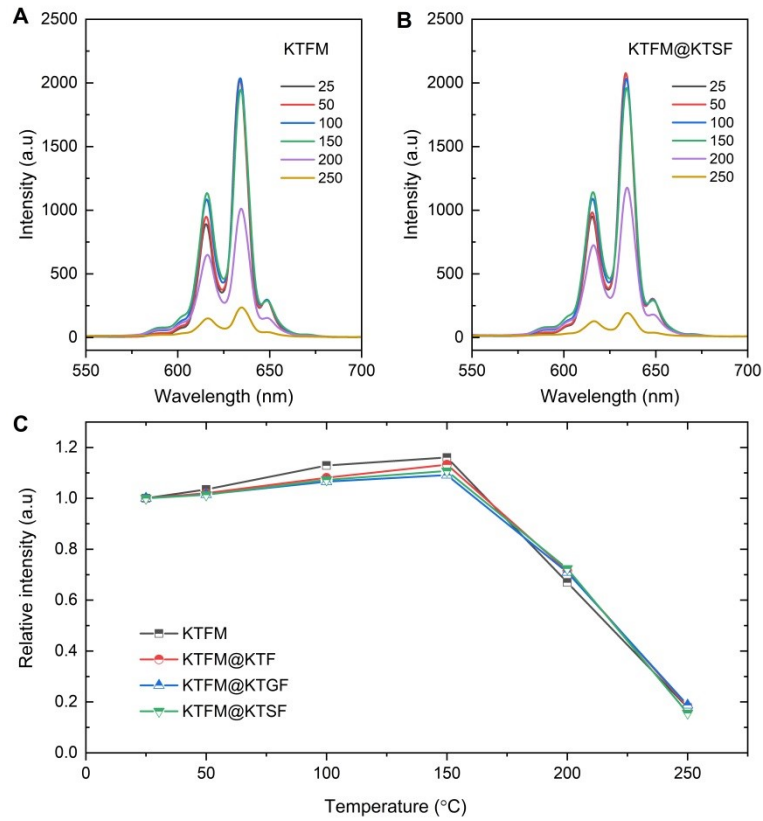

**Fig. S13** Temperature-dependent PL spectra for (A) KTFM and (B) KTFM@KTSF. (C) Relative PL intensities of KTFM, KTFM@KTF, KTFM@KTGF and KTFM@KTSF samples as a function of temperature (25 -250 °C).

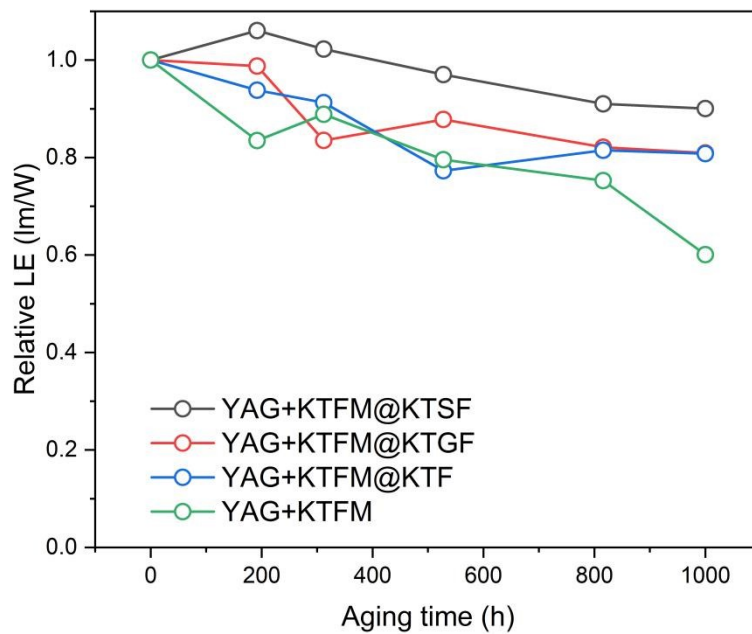

**Fig. S14** Relative luminous efficacy of four WLEDs as function of aging time.

**Table S1.** Internal quantum efficiencies (IQE), Relative PL intensity after immersion in water of core-shell fluorides and aging performance of WLEDs using these red phosphors.

| Sample                                                                                        | IQE | Relative PL intensity after immersion in water (%/h) | Relative LE of WLED@HTHH (%/h) | Ref.      |
|-----------------------------------------------------------------------------------------------|-----|------------------------------------------------------|--------------------------------|-----------|
| $\text{K}_2\text{TiF}_6:\text{Mn}^{4+}@\text{K}_2\text{Ti}_{1-x}\text{Si}_x\text{F}_6$        | 94% | 91%/360                                              | 90%/1000                       | This work |
| $\text{K}_2\text{TiF}_6:\text{Mn}^{4+}@\text{K}_2\text{Ti}_{1-x}\text{Ge}_x\text{F}_6$        | 98% | 85%/360                                              | 81%/1000                       | This work |
| $\text{K}_2\text{TiF}_6:\text{Mn}^{4+}@\text{K}_2\text{TiF}_6$                                | 93% | 50%/300                                              | 89%/480                        | [1]       |
| $\text{K}_2\text{SiF}_6:\text{Mn}^{4+}@\text{K}_2\text{SiF}_6$                                | 76% | 82%/4                                                |                                | [2]       |
| $\text{K}_2\text{SiF}_6:\text{Mn}^{4+}@\text{PA}$                                             | 99% | 88.5%/360                                            |                                | [3]       |
| KSFM-RSRC                                                                                     | 98% | 94%/360                                              | 89%/500                        | [4]       |
| $\text{K}_2\text{TiF}_6:\text{Mn}^{4+}$ with surface passivation using $\text{H}_2\text{O}_2$ | 83% | 97%/12                                               | 39%/2400                       | [5]       |
| $\text{K}_2\text{TiF}_6:\text{Mn}^{4+}/\text{CaF}_2$                                          | 79% | 86.4%/2                                              |                                | [6]       |

## References

- [1] Huang, D.; Zhu, H.; Deng, Z.; Zou, Q.; Lu, H.; Yi, X.; Guo, W.; Lu, C.; Chen, X., Moisture-resistant  $\text{Mn}^{4+}$ -doped core-shell-structured fluoride red phosphor exhibiting high luminous efficacy for warm white light-emitting diodes. *Angew. Chem. Int. Ed.* **2019**, *58* (12), 3843-3847.
- [2] Jiang, C.; Li, L.; Brik, M. G.; Lin, L.; Peng, M., Epitaxial growth via anti-solvent-induced deposition towards a highly efficient and stable  $\text{Mn}^{4+}$  doped fluoride red phosphor for application in warm WLEDs. *J. Mater. Chem. C* **2019**, *7* (20), 6077-6084.
- [3] Zhou, J.; Wang, Y.; Chen, Y.; Zhou, Y.; Milićević, B.; Zhou, L.; Yan, J.; Shi, J.; Liu, R.-S.; Wu, M., Single-Crystal Red Phosphors and Their Core-Shell Structure for Improved Water-Resistance for Laser Diodes Applications. *Angew. Chem. Int. Ed.*

**2021**, *60* (8), 3940-3945.

[4] Wan, P.; Liang, Z.; Luo, P.; Lian, S.; Zhou, W.; Liu, R.-S., Reconstruction of Mn<sup>4+</sup>-free shell achieving highly stable red-emitting fluoride phosphors for light-emitting diodes. *Chem. Eng. J.* **2021**, *426*, 131350.

[5] Zhou, Y.; Song, E.; Deng, T.; Wang, Y.; Xia, Z.; Zhang, Q., Surface Passivation toward Highly Stable Mn<sup>4+</sup>-Activated Red-Emitting Fluoride Phosphors and Enhanced Photostability for White LEDs. *Adv. Mater. Interfaces* **2019**, *6* (9), 1802006-1802020.

[6] Huang, L.; Liu, Y.; Si, S.; Brik, M. G.; Wang, C.; Wang, J., A new reductive DL-mandelic acid loading approach for moisture-stable Mn<sup>4+</sup> doped fluorides. *Chem. Commun.* **2018**, *54* (84), 11857-11860.
